# Supplementary material
Source: MDPI journal article supplement (https://www.mdpi.com/1424-8247/15/11/1407)
Supplement: s1 [file s1]

*Supplementary Table S1.* The detailed information of combined radiotherapy

| Case number | Radiotherapy | Location and Dosage                                |
|-------------|--------------|----------------------------------------------------|
| 1           | Palliative   | Whole brain (3000 cGy)                             |
| 2           | Palliative   | Primary tumor (3000 cGy)                           |
| 3           | Palliative   | Whole brain (3000 cGy), Bone metastasis (3000 cGy) |
| 4           | Palliative   | Primary tumor (2000 cGy)                           |
| 5           | Palliative   | Primary tumor (3000 cGy)                           |
| 6           | Palliative   | Primary tumor (3000 cGy), Whole brain (3000 cGy)   |
| 7           | Palliative   | Primary tumor (3000 cGy)                           |
| 8           | Palliative   | Primary tumor (3000 cGy)                           |
